# Supplementary material for: Comparative Proteomic Analysis of Light-Induced Mycelial Brown Film Formation in Lentinula edodes
Source: Hindawi journal article supplement (doi:10.1155/2016/5837293), 2016-01-01
Supplement: f1 [file 5837293.f1.pdf]

# Supplementary Materials

599 **Table S1 Primers for qRT-PCR.**

| Unigene ID | Putative function                                        | Primer                                                                    |
|------------|----------------------------------------------------------|---------------------------------------------------------------------------|
|            | 18S rRNA                                                 | F: 5'- AAACGGCTACCACATCCA -3'<br>R: 5'- CACCAGACTTGCCCTCCA-3'             |
| 1549       | 3-isopropylmalate dehydrogenase<br>( <i>idh</i> )        | F: 5'- AGTGCGGAGCCAGACATTG -3'<br>R: 5'- TCCATCGGTGGGTTTCGTC -3'          |
| 6339       | NAD-aldehyde dehydrogenase<br>( <i>ndh</i> )             | F: 5'- TCCAAGATGGCTTTCACTCG -3'<br>R:5'- CGGACAGTTTCAAAGCAGTGAG -3'       |
| 10501      | nucleoside diphosphate kinase<br>( <i>ndk</i> )          | F: 5'- AGCGTGGACTCGTTGGTGA -3'<br>R:5'- GGTCGGCGTAGTGTTTCTCG -3'          |
| 1799       | adenosine kinase ( <i>ake</i> )                          | F: 5'- TGTGGGATAAAAGGTGCCG -3'<br>R:5'- GCCTGAGATTTCCGCTGTTC -3'          |
| 6580       | 20S proteasome subunit ( <i>pst</i> )                    | F: 5'- TGGGTGGAATAGAGGAAGACG -3'<br>R: 5'- CTGTCGTTAGTGGGAGATGTTGA<br>-3' |
| 17492      | proteasome component pts1 ( <i>pcp</i> )                 | F: 5'- GAACAATGATTTGCGGTTGG -3'<br>R:5'- CTCCTCGTCAGTCAAGTCCC -3'         |
| 10337      | heat shock cognate 70 ( <i>hsc</i> )                     | F: 5'- GCGATTCCAAGATTGATAAGGC -3'<br>R:5'- CAGCACCGTAGGCAACAGC -3'        |
| 13243      | manganese superoxide dismutase<br>( <i>msd</i> )         | F: 5'- CGCACAAGCCTCAACAACC -3'<br>R:5'- CCACTTCCGCCCTTCTCA -3'            |
| 16831      | alcohol dehydrogenase ( <i>adh</i> )                     | F:5'- AAAGTCGGAGACCGTGTTGG -3'<br>R:5'- GCAGGATCGAGTTCTGTGGG -3'          |
| 6754       | glyoxalase ( <i>gly</i> )                                | F:5'- CGAGAATCATCCGTGGGC -3'<br>R:5'- TGGCATCTCAGGACCATAACAAG -3'         |
| 16026      | glutathione S-transferase-like<br>protein ( <i>gtp</i> ) | F:5'- CCAACCATCTCCTTCGTCCA -3'<br>R:5'- AGGTGAAGAGGGCGGGTC -3'            |

600 Specific primers of 11 experimentally validated unigene designed for qRT-PCR using  
601 Primer Premier 5.0.

602

603

604

605

606

607

608

609

610

611

612

613

614

615

616

617 **Table S2. Differentially expressed protein spots on 2-DE gels from *L. edodes***  
 618 **mycelium samples 313C and 313W as identified by MS/MS.**

| Spot no.                                | Unigene No. | Gi no.       | Protein name                              | Protein score | Ion score <sup>a</sup> /Sequence <sup>b</sup>                                                                                                                      | Fold change(313C/313W) |
|-----------------------------------------|-------------|--------------|-------------------------------------------|---------------|--------------------------------------------------------------------------------------------------------------------------------------------------------------------|------------------------|
| <b>Small molecule metabolic process</b> |             |              |                                           |               |                                                                                                                                                                    |                        |
| 6602                                    | 6339        | gi 170091726 | NAD-aldehyde dehydrogenase                | 265           | 31/DIDVAVAAAAR; 23/IAFTGSTLTGR; 83/DFDIGDSIQCLR; 81/YYAGWADKITGQTIEVDNK; 90/DAQELAELETLNNGKPVAIAR; 73/IYVQDTVYDKFIDVLVSTVK                                         | 0.15                   |
| 8703                                    | 1549        | gi 169861624 | 3-isopropylmalate dehydrogenase           | 447           | 56/ELIGGLYFGK;39/IRPEPGLLTLR; 86/VLDLPSAGGYGLR; 81/KVLDLPSAGGYGLR;36/GIANPIGTILSAAMLLR; 122/YSLGLDKPASAIEAAVR; 88IVVLPDGDGIGPEVVAAEAIK; 108/FDHQLVDSTAMVMVANPR     | 2.00                   |
| 7702                                    | 8679        | gi 299748202 | succinate-semialdehyde dehydrogenase      | 58            | 58/IYVHSTVYAEFASR                                                                                                                                                  | 0.12                   |
| 2804                                    | 6339        | gi 170091726 | NAD-aldehyde dehydrogenase                | 127           | 46/IAFTGSTLTGR; 44/DFDIGDSIQCLR; 106/DAQELAELETLNNGKPVAIAR                                                                                                         | 2.18                   |
| 6902                                    | 10332       | gi 299741158 | hsp70-like protein                        | 44            | 26/DIKHWPFEVR; 44/VTHAVVTVPAYFNDAQR                                                                                                                                | 0.14                   |
| 8605                                    | 1203        | gi 169852954 | methionine adenosyltransferase            | 104           | 33/ATIPANLLDER; 32/ELDLQRPNYK; 80/FVIGGPQGDAGLTGR; 9/NNWDLRPGVMVR                                                                                                  | 0.18                   |
| 5704                                    | 18087       | gi 299754101 | heat shock protein                        | 645           | 101/DAGAIAGLDVLR; 86/IQALVSEYFGGR; 65/ARFEEINAAMFK; 50/ARFEEINAAMFK; 111/TTPSYVAFSAEER; 100/AVVTVPAYFNDSQR; 133/IINEPTAAAIAAYGLDR; 175/TLSSVTQTTVEVDSLYQGEDFSANITR | 0.23                   |
| 3603                                    | 8681        | gi 169851323 | aspartate kinase homoserine dehydrogenase | 293           | 46/RLPEFDAEFDQMR; 68/TVYFEPTNAITSIEK; 96/FLNESTVGAGLPVISTLK; 89/GYTEPHPADDLNGFDVAR; 72/TILSESNEKPDYESLTAK; 33/EKGYTEPHPADDLNGFDVAR; 56/YPTSHPFATSLGGSDNIIMFHTER    | 0.08                   |
| 7801                                    | 10131       | gi 169848281 | diphosphomevalonate                       | 58            | 14/QIEIIVR; 17/GLIHTSIGDGPR; 31/SIISIEELNR;                                                                                                                        | 0.06                   |

|      |       |              |                                      |     |                                                                                                                                                                                                                         |      |
|------|-------|--------------|--------------------------------------|-----|-------------------------------------------------------------------------------------------------------------------------------------------------------------------------------------------------------------------------|------|
| 2909 | 1799  | gi 169845471 | decarboxylase<br>adenosine<br>kinase | 526 | 47/DTTLILPTNSSLSVTLSDHLR<br>62/HAPIYEEVVK; 57/EGLQDMYYVK;<br>144/AHLSSPEISAVLES AK;<br>143/NYQVTYVAGGASQNAAR;<br>139/KGEQTGACAVVITGHNR;<br>165/IVVLTHGAESTVVVTS DAPDAPK;<br>83/AYYMEGFLLTHGLES ALELSQK;                 | 2.75 |
| 2910 | 1799  | gi 169845471 | adenosine<br>kinase                  | 401 | 62/HAPIYEEVVK; 50/EGLQDMYYVK; 141/<br>AHLSSPEISAVLES AK; 148/<br>NYQVTYVAGGASQNAAR; 105/<br>KGEQTGACAVVITGHNR; 96/<br>AYYMEGFLLTHGLES ALELSQK                                                                           | 2.14 |
| 3704 | 10337 | gi 299753594 | heat shock<br>cognate 70             | 641 | 64/LVNHF IQEFK; 81/EGKPYIEVEYR;<br>123/TTPSYVAFTDGER;<br>85/ANVHEIVLVGGSTR;<br>65/ARFEELCQDLFR; 76/EGKPYIEVEYRGEK;<br>140/IDKANVHEIVLVGGSTR;<br>183/TLSSAAQTSIEIDSL YEGIDFY TSLTR                                       | 0.34 |
| 3705 | 10337 | gi 299753594 | heat shock<br>cognate 70             | 643 | 67/LVNHF IQEFK; 83/EGKPYIEVEYR;<br>123/TTPSYVAFTDGER;<br>88/ANVHEIVLVGGSTR; 77/ARFEELCQDLFR;<br>67/EGKPYIEVEYRGEK;<br>149/IDKANVHEIVLVGGSTR;<br>156/TLSSAAQTSIEIDSL YEGIDFY TSLTR;                                      | 0.19 |
| 7404 | 10337 | gi 299753594 | heat shock<br>cognate 70             | 371 | 34/LTKEEIER; 53/FELSGIPPAPR;<br>94/NGLESYSYNLR;<br>109/MVSEAEKYKAEDEAATAR;<br>129/DNNLLGKFELSGIPPAPR;<br>161/SETFSTYADNQP GVLIQVFEGER;<br>125/KSETFSTYADNQP GVLIQVFEGER                                                 | 2.31 |
| 4201 | 10337 | gi 299753594 | heat shock<br>cognate 70             | 334 | 77/FELSGIPPAPR; 55/YKAEDEAATAR;<br>81/NGLESYSYNLR;<br>34/DNNLLGKFELSGIPPAPR;<br>87/WLDESQEASKEEYEEK;<br>93/DNNLLGKFELSGIPPAPR;<br>136/SETFSTYADNQP GVLIQVFEGER                                                          | 0.35 |
| 7402 | 10337 | gi 299753594 | heat shock<br>cognate 70             | 545 | 81/FELSGIPPAPR; 87/NGLESYSYNLR;<br>78/DNNLLGKFELSGIPPAPR;<br>132/DNNLLGKFELSGIPPAPR;<br>143/GVPQIEVTFDIDANGILNVSAADK;<br>151/SETFSTYADNQP GVLIQVFEGER;<br>52/SETFSTYADNQP GVLIQVFEGER;<br>125/KSETFSTYADNQP GVLIQVFEGER | 0.14 |
| 3101 | 439   | gi 299752336 | glyoxalase I                         | 619 | 22/VRDPDISVK; 79/FYTEIIGMDLLSK;                                                                                                                                                                                         | 0.46 |

---

|                                            |       |              |                                            |     |                                                                                                                                                                      |      |
|--------------------------------------------|-------|--------------|--------------------------------------------|-----|----------------------------------------------------------------------------------------------------------------------------------------------------------------------|------|
|                                            |       |              |                                            |     | 54/FYTEIIGMDLLSK;<br>117/TAETASFQFNHTMIR;<br>44/TAETASFQFNHTMIR;<br>143/GFGHIAITVDDVEEACAR;<br>144/HIAFILDPDGYWIEVVPSTLKL;<br>168/EGVLELTHNHGTETDASFAGYSSGNSEPG<br>K |      |
| 2704                                       | 1337  | gi 310798928 | glutamine<br>amidotransferas<br>e class-II | 175 | 47/YEPTQQGR; 42/SLYLSLTAGEK;<br>63/VGPFTPGPGSER;<br>95/KYFPELPAPTESEDVDNTDVK                                                                                         | 2.22 |
| 2702                                       | 1337  | gi 310798928 | glutamine<br>amidotransferas<br>e class-II | 211 | 42/YEPTQQGR; 64/SLYLSLTAGEK;<br>61/VGPFTPGPGSER;<br>123/KYFPELPAPTESEDVDNTDVK;                                                                                       | 0.21 |
| 9001                                       | 16831 | gi 189207801 | alcohol<br>dehydrogenase                   | 153 | 88/VIVATAPQGEAIATLLGGLK;<br>88/KGDLVAVHGLGGLGHLGIQYAK;                                                                                                               | 3.79 |
| 0006                                       | 10501 | gi 169853921 | nucleoside<br>diphosphate<br>kinase        | 332 | 72/GKPFPPGLIK; 116/NICHGSDAVESAQK;<br>39/EQTYIMVKPDGVQR;<br>91/EQTYIMVKPDGVQR; 23/<br>VMLGATNPLASAPGTIR; 77/<br>YMASGPVVAMVWEGLDAVK;<br>69/YMASGPVVAMVWEGLDAVK       | 3.06 |
| 7102                                       | 10501 | gi 169853921 | nucleoside<br>diphosphate<br>kinase        | 76  | 64/GKPFPPGLIK; 38/VMLGATNPLASAPGTIR                                                                                                                                  | 2.88 |
| 6204                                       | 10501 | gi 169853921 | nucleoside<br>diphosphate<br>kinase        | 67  | 64/GKPFPPGLIK; 28/VMLGATNPLASAPGTIR;<br>54/YMASGPVVAMVWEGLDAVK                                                                                                       | 2.43 |
| 9202                                       | 10501 | gi 169853921 | nucleoside<br>diphosphate<br>kinase        | 197 | 53/GDYALAVGR; 66/GKPFPPGLIK;<br>66/LVQATTEHLEK;<br>29/VMLGATNPLASAPGTIR;<br>28/VMLGATNPLASAPGTIR;<br>88/YMASGPVVAMVWEGLDAVK;                                         | 2.10 |
| 7204                                       | 18648 | gi 170085829 | phosphopyruvat<br>e hydratase              | 169 | 43/IALDVASSEFYK; 29/AVANVNDTIAPELIK;<br>80/IEEETAGSGAFFAGDK;<br>79/NSGIQIVGDDLTVTNPLR                                                                                | 0.10 |
| 3003                                       | 6339  | gi 170091726 | NAD-aldehyde<br>dehydrogenase              | 57  | 9/AVHWNIGEK; 53/KEEIFGPVLSIGR;<br>57/ELGSYALEEYTSVK;                                                                                                                 | 0.05 |
| <b>Cellular aldehyde metabolic process</b> |       |              |                                            |     |                                                                                                                                                                      |      |
| 7703                                       | 8970  | gi 299740308 | aldo-keto<br>reductase                     | 94  | 31/FGITPQGPR; 57/ELGVTIVAYSPLAR;<br>53/HIDTAHIYADSEALLGK;<br>53/LGVETIDLYYQHRPDPK;                                                                                   | 0.13 |
| <b>Single-organism catabolic process</b>   |       |              |                                            |     |                                                                                                                                                                      |      |
| 9308                                       | 5763  | gi 82408362  | family A1<br>protease                      | 119 | 74/ATLDQTTGLLK; 72/FKPNSSVESTR                                                                                                                                       | 2.10 |

---

| <b>Organic substance catabolic process</b>      |       |              |                                                   |     |                                                                                                                                                   |      |
|-------------------------------------------------|-------|--------------|---------------------------------------------------|-----|---------------------------------------------------------------------------------------------------------------------------------------------------|------|
| 6504                                            | 6580  | gi 170089877 | 20S proteasome subunit                            | 245 | 17/LIQTMLYSR; 45/QSEGYSIQTR; 108/HIEVGDGLEMFIVLAK; 72/AAGAAQSLVQPFLDNQIYFK; 87/GSPLYGLENIDGVQEMTVTNEGER                                           | 2.25 |
| 7505                                            | 17492 | gi 299752963 | proteasome component pts1                         | 292 | 28/FIGNYDISK; 54/FQGGVIVAVDSR; 93/TGPAVIFYVDSDGTR; 62/WDLTDEEAQELGR; 97/LHYDGPGETPGAGYGYDIR; 71/LKGDLSVSGSTFAYGVLDQGYR;                           | 4.07 |
| <b>Response to oxidative stress</b>             |       |              |                                                   |     |                                                                                                                                                   |      |
| 8205                                            | 976   | gi 299739322 | thioredoxin-dependent peroxidase                  | 62  | 52/LGLDLDLSALAFGTR; 33/KGLDLDLSALAFGTR                                                                                                            | 0.41 |
| 2202                                            | 13243 | gi 15042614  | manganese superoxide dismutase                    | 463 | 138/EAVIASFGSLENLQK; 127/VDYLNAIWHVINFDQAQK; 81/VDYLNAIWHVINFDQAQK; 85/VDYLNAIWHVINFDQAQK; 95/FNGGGHINHSFLWQNLAAAPSEK; 179/HHQTYVNALNAAEAFAQASTTK | 2.39 |
| <b>Oxidation-reduction process</b>              |       |              |                                                   |     |                                                                                                                                                   |      |
| 8402                                            | 6638  | gi 170090950 | protein disulfide isomerase                       | 173 | 77/VNFVWIDAIK; 68/WPSFVIQDLEK; 82/QFVSGELKPELK                                                                                                    | 0.33 |
| Positive regulation of protein complex assembly |       |              |                                                   |     |                                                                                                                                                   |      |
| 3402                                            | 6449  | gi 170103737 | nucleosome assembly protein                       | 290 | 111/NHIGLADLITER; 41/YLALQKPLYER; 63/NHIGLADLITERDEGALK; 83/ENIVPSAIPFWLTALR; 95/LSYLNENEKEYEGKPGFK; 76/SYLYQDEVGYSGDFVYYK                        | 0.22 |
| <b>Protein metabolic process</b>                |       |              |                                                   |     |                                                                                                                                                   |      |
| 7203                                            | 8798  | gi 149689513 | small ubiquitin-related modifier                  | 87  | 24/VGKEPHTIR; 87/VVSSSGEEVFFK; 41/SEEDQQAPPTQEDVK                                                                                                 | 0.50 |
| <b>Others and unknown</b>                       |       |              |                                                   |     |                                                                                                                                                   |      |
| 5902                                            | 13069 | gi 302682544 | glycoside hydrolase family 13 protein             | 147 | 32/SIYQVMTDR; 14/SIYQVMTDR; 59/LYAYFATLNTFR; 40/QALWLTGYPTGSNK; 69/DVSLLGSFMENHDNAR; 40/DVSLLGSFMENHDNAR                                          | 0.07 |
| 5601                                            | 980   | gi 259479840 | TPA: ketoreductase (AFU_orthologue; AFUA_2G10280) | 508 | 85/EALDNGYIVR; 118/ILVTGANGFLGAHIVK; 120/DFLDPAIDGTLNVLR; 103/LSPIPEADPLAGKPFK; 82/KDFLDPAIDGTLNVLR; 126/AIPDTPVPFCDVVSTAQIHVK                    | 0.08 |

|      |       |              |                                                                    |     |                                                                                                                                                                                                                              |      |
|------|-------|--------------|--------------------------------------------------------------------|-----|------------------------------------------------------------------------------------------------------------------------------------------------------------------------------------------------------------------------------|------|
| 8801 | 11547 | gi 169861778 | tripeptidyl<br>peptidase A                                         | 154 | 99/AYPDVAAQGEQFQVVVGGGR;<br>75/LFAQPSYQTSAVSAYLAK;                                                                                                                                                                           | 0.49 |
| 2203 | 6372  | gi 170086626 | linoleate diol<br>synthase                                         | 33  | 33/GLLYPDTFSEER                                                                                                                                                                                                              | 2.56 |
| 9901 | 6259  | gi 299749665 | proliferation-ass<br>ociated 2G4                                   | 29  | 29/AGAFPFNIR                                                                                                                                                                                                                 | 0.12 |
| 0301 | 1377  | gi 299738240 | short-chain<br>dehydrogenase/r<br>eductase SDR                     | 561 | 63/YAAPQYSIR; 46/LGYSIALIAR;<br>103/GILIFTGATASIR; 91/NNPEWEQNEDVR;<br>151/LSPEAIASSYVYLASQER;<br>127/QNIHVAAHAIDGSISTPLSR;<br>125/IITETNVEGSFafaHEVLSDFKK                                                                   | 3.61 |
| 8002 | 19905 | gi 302682522 | carbohydrate-bi<br>nding module<br>family 13<br>protein            | 660 | 113/SGTILDLSGTDGR;<br>99/TISGFSDNGGDNQK;<br>111/WQLEQQGGHWTFR;<br>92/WDIYPDEDEDSSVFR;<br>58/WQLEQQGGHWTFR;<br>204/NAASGQYLGVGPFEDGTPLISVDEPVR;<br>116/TISGFSDNGGDNQKWQLEQQGGHWTFR;<br>75/IYVPGAPTALNIDLSDHGNPTPGTIVTLWG<br>K | 0.11 |
| 3706 | 6456  | gi 299756017 | lincomycin-con<br>densing protein<br>lmbA                          | 308 | 115/HFGSGSLSVADVLAPAIR;<br>116/GVVSSSQPLATEAGLEILR;<br>84/LAEEGVPVSEIHSFSWQR;<br>50/LAEEGVPVSEIHSFSWQR;<br>64/LAFSDSQYYVTDPDVVNPVEELLNR                                                                                      | 0.10 |
| 6503 | 1450  | gi 189190374 | NAD dependent<br>epimerase/dehy<br>dratase family<br>protein       | 85  | 69/SDFETFDIR;<br>37/ILMTGVTGYIGGTILTR                                                                                                                                                                                        | 2.04 |
| 2803 | 980   | gi 259479840 | TPA:<br>ketoreductase<br>(AFU_ortholog<br>ue;<br>AFUA_2G1028<br>0) | 279 | 57/EALDNGYIVR; 74/GPGTVYQMLQIIAK;<br>78/DFLDPAIDGTLNVLR;<br>91/LSPIPEADPLAGKPFQK;<br>71/KDFLDPAIDGTLNVLR;                                                                                                                    | 2.27 |
| 0603 | 15960 | gi 125503211 | lipase                                                             | 208 | 76/LPDLSHINNK; 112/VGNQAFANLIDSK;<br>180/EQAQTATAVLAQVQAMSAH;<br>121/EDPVPILPGEFLGFVHPSGEK;<br>85/LPDLSHINNKEDPVPILPGEFLGFVHPSGEK                                                                                            | 2.06 |
| 8802 | 11547 | gi 169861778 | tripeptidyl<br>peptidase A                                         | 356 | 159/AYPDVAAQGEQFQVVVGGGR;<br>91/LFAQPSYQTSAVSAYLAK;<br>154/IGITGYLEQFASNSDLATFVK                                                                                                                                             | 0.16 |
| 6502 | 16026 | gi 75911207  | glutathione                                                        | 42  | 23/FFIDTFANK; 39/FGPALFTFQSGK                                                                                                                                                                                                | 2.41 |

---

|      |       |              |                                          |     |                                                                                                     |      |
|------|-------|--------------|------------------------------------------|-----|-----------------------------------------------------------------------------------------------------|------|
|      |       |              | S-transferase-like protein               |     |                                                                                                     |      |
| 9101 | 17492 | gi 299752963 | proteasome component pts1                | 30  | 9/TGPAVFYVDSGTR;<br>30/LHYDGPGETPGAGYGYDIR                                                          | 3.07 |
| 5404 | 6754  | gi 310791466 | glyoxalase                               | 229 | 40/RLPLPFCGDVTPR;<br>113/SLDYIIGYSGVTSADAER;<br>87/APGWIDYAFLGNGSETVR;<br>54/VPNEPPAIFEHPCTALGIAYVR | 2.67 |
| 3302 | 15973 | gi 160184939 | competence/damage-inducible protein CinA | 43  | 43/GPDEQIVIGLASHLR                                                                                  | 0.46 |
| 2904 | 16388 | gi 260907550 | FG-GAP repeat-containing protein         | 28  | 28/IQVAGFPIIVR                                                                                      | 0.33 |

---

619 <sup>a</sup>The score of matched peptides; <sup>b</sup>The sequence of matched peptides

620

621
